# Supplementary material
Source: HighWire-hosted journal article supplement (http://thorax.bmjjournals.com/highwire/filestream/174237/field_highwire_adjunct_files/2/64Suppl1i1-i52WebAppendix11.pdf)
Supplement: 64Suppl1i1-i52WebAppendix11.pdf [file 64Suppl1i1-i52WebAppendix11.pdf]

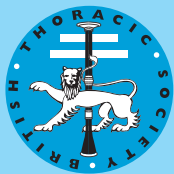

**BTS/ACPRC Guideline**  
**Physiotherapy management of the adult, medical, spontaneously breathing patient**  
**Web Appendix 11 – Respiratory Physiotherapy Equipment and Devices**

www.brit-thoracic.org.uk

| Equipment                                                | Manufacturer                                  | UK supplier                                       | Address/ website address                                                                                                                                             |
|----------------------------------------------------------|-----------------------------------------------|---------------------------------------------------|----------------------------------------------------------------------------------------------------------------------------------------------------------------------|
|                                                          |                                               | NHS supplies                                      | <a href="http://www.nhssupplies.net">www.nhssupplies.net</a>                                                                                                         |
| <b>Positive Expiratory Pressure (PEP)</b>                |                                               |                                                   |                                                                                                                                                                      |
| Facemask PEP                                             | AstraTech Ltd                                 | AstraTech Ltd                                     | Stonehouse,<br>Gloucestershire<br>GL10 3SW<br><a href="http://www.astratechuk.com">www.astratechuk.com</a>                                                           |
| Mouthpiece<br>PARI PEP®                                  | PARI GmbH Starnberg<br>Germany                | PARI Medical Ltd<br>NHS supplies                  | The Old Sorting Office,<br>Rosemount Avenue,<br>West Byfleet,<br>Surrey.<br>KT14 6LB<br><a href="http://www.pari.com">www.pari.com</a>                               |
| TheraPEP                                                 | DHD Healthcare,<br>Wampsville, NY             | Henley's medical supplies Ltd                     | Brownfields,<br>Welwyn Garden City,<br>AL7 1AN<br><a href="http://www.henleysmed.com">www.henleysmed.com</a>                                                         |
| Threshold® PEP                                           | Respironics                                   | Respironics Respiratory<br>Drug Delivery (UK) Ltd | Chichester Business Park,<br>City Fields Way,<br>Tangmere,<br>Chichester,<br>West Sussex<br>PO20 2FT<br><a href="http://www.respironics.com">www.respironics.com</a> |
| <b>Oscillating Positive Expiratory Pressure (OscPEP)</b> |                                               |                                                   |                                                                                                                                                                      |
| Flutter®                                                 | Scandipharm, Birmingham, AL                   | NHS supplies<br>Clement Clarke Ltd                | Edinburgh Way, Harlow, Essex.<br>CM20 2TT<br><a href="http://www.clement-clarke.com">www.clement-clarke.com</a>                                                      |
| Acapella®                                                | DHD Healthcare, Wampsville,<br>NY             | Henley's medical supplies Ltd                     | Brownfields,<br>Welwyn Garden City,<br>AL7 1AN,<br><a href="http://www.henleysmed.com">www.henleysmed.com</a>                                                        |
| RC-Cornet®                                               | Pari respiratory equipment,<br>Midlothian, VA | NHS supplies<br>PARI Medical Ltd                  | The Old Sorting Office,<br>Rosemount Avenue,<br>West Byfleet,<br>Surrey.<br>KT14 6LB<br><a href="http://www.pari.com">www.pari.com</a>                               |

| Equipment                                              | Manufacturer                             | UK supplier                                    | Address/ website address                                                                                                                                                                                       |
|--------------------------------------------------------|------------------------------------------|------------------------------------------------|----------------------------------------------------------------------------------------------------------------------------------------------------------------------------------------------------------------|
| <b>Respiratory Muscle Trainers</b>                     |                                          |                                                |                                                                                                                                                                                                                |
| Trainair®                                              | Project Electronics Limited              | Project Electronics Limited                    | Project House,<br>Slade Green Road,<br>Erith,<br>Kent<br>DA8 2HX<br><a href="http://www.trainair.co.uk">www.trainair.co.uk</a><br><a href="http://www.viasyshealthcare.com">www.viasyshealthcare.com</a>       |
| Powerbreathe®                                          | Gaiam Ltd                                | Various                                        | <a href="http://www.powerbreathe.com">www.powerbreathe.com</a>                                                                                                                                                 |
| Pflex®                                                 | Respironics                              | Respironics Respiratory Drug Delivery (UK) Ltd | Chichester Business Park,<br>City Fields Way,<br>Tangmere,<br>Chichester,<br>West Sussex<br>PO20 2FT<br><a href="http://www.respironics.com">www.respironics.com</a>                                           |
| <b>Intermittant Positive Pressure Breathing (IPPB)</b> |                                          |                                                |                                                                                                                                                                                                                |
| Bird                                                   | Viasys Healthcare                        | EME Product Operations                         | Welton Road, Warwick,<br>Warwickshire CV34 5PZ<br><a href="http://www.viasyshealthcare.com">www.viasyshealthcare.com</a>                                                                                       |
| <b>Mechanical Insufflator-Exsufflator (MI-E)</b>       |                                          |                                                |                                                                                                                                                                                                                |
| Cough assist®                                          | Respironics                              | Respironics Respiratory Drug Delivery (UK) Ltd | Chichester Business Park, City Fields Way, Tangmere, Chichester, West Sussex PO20 2FT<br><a href="http://www.respironics.com">www.respironics.com</a>                                                          |
| <b>Intrapulmonary Percussive Ventilation (IPV)</b>     |                                          |                                                |                                                                                                                                                                                                                |
| Percussion-aire                                        | Percussionaire Corp., Sandpoint, ID, USA | I.M.A.Pe                                       | Marina Buro-1752 RN7, 06270 Villeneuve Loube, France<br><a href="http://www.percussionaire.com">www.percussionaire.com</a><br><a href="http://www.france-percussionaire.com">www.france-percussionaire.com</a> |
| IM II                                                  | Breas Medical                            | Vital Signs Ltd.                               | 13-14 Eldon Way, Lineside Industrial State, Littlehampton, West Sussex, BN177HE<br><a href="mailto:vitalcare@vital-signs.co.uk">vitalcare@vital-signs.co.uk</a>                                                |
| <b>High Frequency Chest Wall Oscillators (HFCWO)</b>   |                                          |                                                |                                                                                                                                                                                                                |
| The Vest™                                              | Hill-Rom                                 | Hill-Rom                                       | Clinitron House, Ashby Park, Ashby de la Zouch, Leicestershire. LE65 1JG<br><a href="http://www.hill-rom.com">www.hill-rom.com</a>                                                                             |
| Smartvest™                                             | Carina VT Ltd                            | Carina VT Ltd                                  | Lancaster House, 29a Harmire Enterprise Park, Barnard Castle. DL12 8XT<br><a href="http://www.carinavt.com">www.carinavt.com</a>                                                                               |

| Equipment                            | Manufacturer             | UK supplier               | Address/ website address                                                                                                                                           |
|--------------------------------------|--------------------------|---------------------------|--------------------------------------------------------------------------------------------------------------------------------------------------------------------|
| <b>Masks and Connectors</b>          |                          |                           |                                                                                                                                                                    |
| Air seal single port inflated mask   | Caradyne                 | Caradyne                  | Parkmore West Business Centre,<br>Parkmore West,<br>Galway Ireland,<br>091709010<br><a href="http://www.caradyne.respironics.com">www.caradyne.respironics.com</a> |
| Laerdal mask                         | Laerdal                  | Laerdal                   | <a href="http://www.laerdal.co.uk">www.laerdal.co.uk</a>                                                                                                           |
| anaesthetic face mask and connectors | Intersurgical Ltd        | Intersurgical Ltd         | Crane House,<br>Molly Millars Lane,<br>Wokingham,<br>Berkshire, RG41 2RZ<br><a href="http://www.intersurgical.com">www.intersurgical.com</a>                       |
| <b>Miscellaneous Equipment</b>       |                          |                           |                                                                                                                                                                    |
| Abdominal Binder                     | Chaneco                  | Chris Hanley and Partners | 4 Kilvey Road,<br>Brackmills,<br>Northampton,<br>NN4 7B2<br><a href="http://www.chaneco.co.uk">www.chaneco.co.uk</a>                                               |
| Peak flow meter                      | Vitalograph Ltd          | Vitalograph Ltd           | Maids Moreton,<br>Buckingham,<br>MK 18 1SW<br><a href="http://www.vitalograph.co.uk">www.vitalograph.co.uk</a>                                                     |
| Distance Measuring wheels            | Trumeter Company Limited | Trumeter Company Limited  | Milltown Street,<br>Radcliffe,<br>Manchester<br>M26 1NX<br><a href="http://www.trumeter.com">www.trumeter.com</a>                                                  |
